# Supplementary material for: Synthesis and evaluation of photocatalytic and photoluminescent properties of Zn2+-doped Bi2WO6
Source: Royal Society of Chemistry journal article supplement (doi:10.1039/d2dt03175b), 2022-01-01

Fig. S1: Observed, calculated and the difference in XRD patterns of  $\text{Bi}_2\text{WO}_6$ :  $\text{Zn}^{2+}$  particles: (a)  $\text{Bi}_2\text{WO}_6$ , (b)  $\text{Bi}_2\text{WO}_6$ : 1%  $\text{Zn}^{2+}$ , (c)  $\text{Bi}_2\text{WO}_6$ : 2%  $\text{Zn}^{2+}$  and (d)  $\text{Bi}_2\text{WO}_6$ : 4%  $\text{Zn}^{2+}$ , (e)  $\text{Bi}_2\text{WO}_6$ : 8%  $\text{Zn}^{2+}$ .

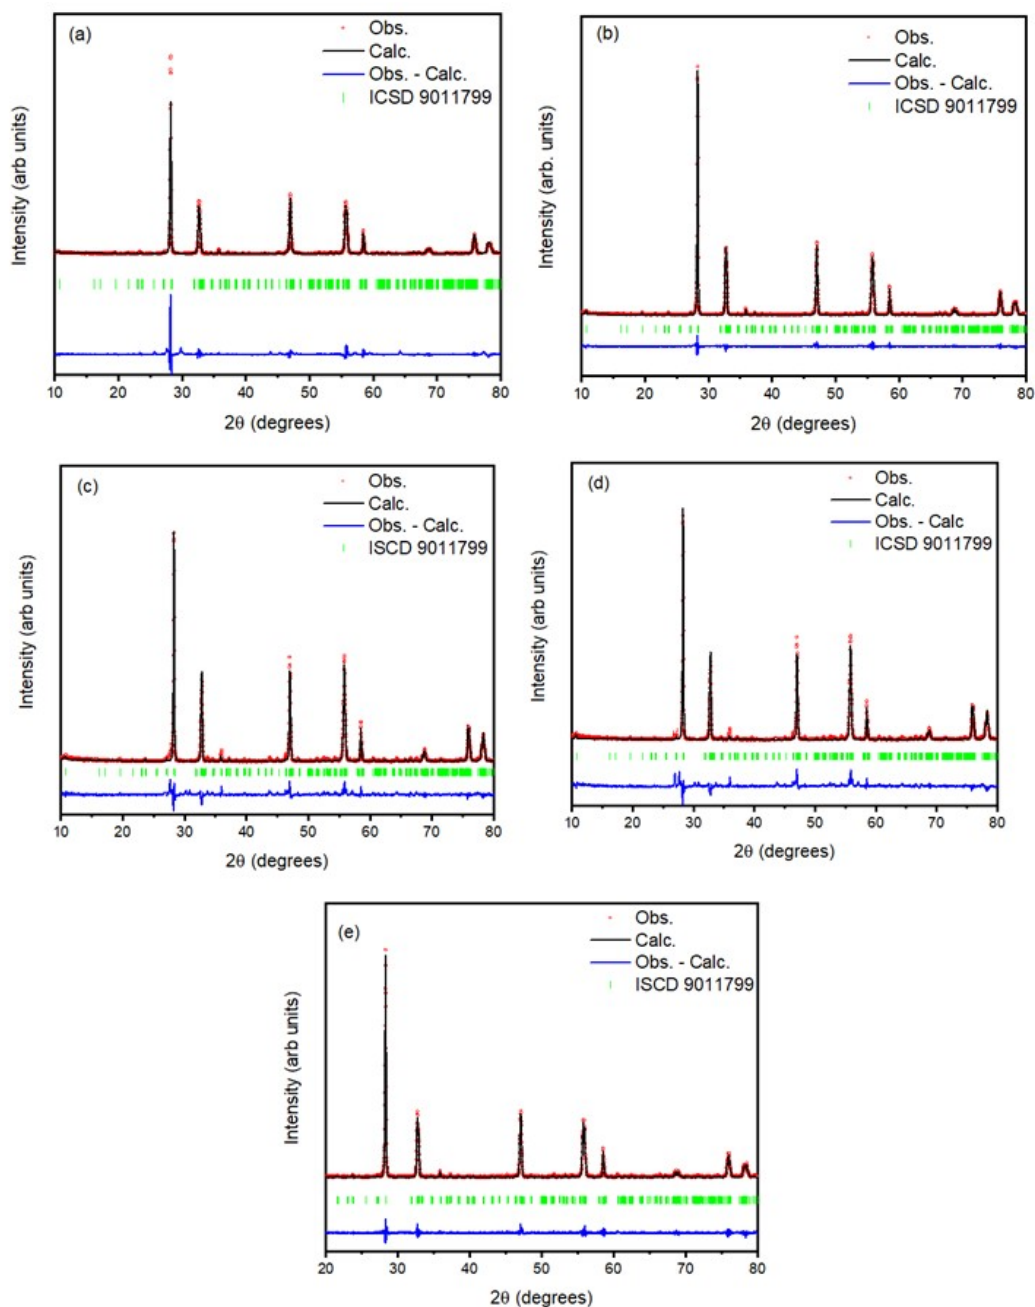

Table S1: Atomic position of  $\text{Bi}_2\text{WO}_6$ : x%  $\text{Zn}^{2+}$  (X = 1, 2, 4 and 8 mol%) samples

$\text{Bi}_2\text{WO}_6$

|      |     | x       | y       | z       | Occ.  | U     | Site |
|------|-----|---------|---------|---------|-------|-------|------|
| (Bi) | Bi1 | 0.51830 | 0.42210 | 0.96480 | 1.000 | 0.006 | 4a   |
| (Bi) | Bi2 | 0.48150 | 0.07780 | 0.98410 | 1.000 | 0.008 | 4a   |
| (W)  | W   | 0.00486 | 0.24990 | 0.00046 | 1.000 | 0.002 | 4a   |
| (O)  | O1  | 0.03821 | 0.12790 | 0.10860 | 1.000 | 0.011 | 4a   |
| (O)  | O2  | 0.25110 | 0.99650 | 0.26430 | 1.000 | 0.009 | 4a   |
| (O)  | O3  | 0.24390 | 0.50930 | 0.23380 | 1.000 | 0.005 | 4a   |
| (O)  | O4  | 0.67830 | 0.22780 | 0.19900 | 1.000 | 0.010 | 4a   |
| (O)  | O5  | 0.10890 | 0.29740 | 0.40860 | 1.000 | 0.012 | 4a   |
| (O)  | O6  | 0.54630 | 0.36680 | 0.58400 | 1.000 | 0.009 | 4a   |

$\text{Bi}_2\text{WO}_6$ : 1% Zn

|      |     | x       | y       | z       | Occ.  | U     | Site |
|------|-----|---------|---------|---------|-------|-------|------|
| (Bi) | Bi1 | 0.52155 | 0.42180 | 0.97600 | 0.990 | 0.006 | 4a   |
| (Bi) | Bi2 | 0.47970 | 0.07670 | 0.97360 | 0.990 | 0.008 | 4a   |
| (W)  | W   | 0.00620 | 0.24880 | 0.00220 | 1.000 | 0.002 | 4a   |
| (O)  | O1  | 0.05510 | 0.12050 | 0.09720 | 1.000 | 0.011 | 4a   |
| (O)  | O2  | 0.23850 | 0.99180 | 0.23830 | 1.000 | 0.009 | 4a   |
| (O)  | O3  | 0.28060 | 0.50640 | 0.19600 | 1.000 | 0.005 | 4a   |
| (O)  | O4  | 0.71480 | 0.23070 | 0.22000 | 1.000 | 0.010 | 4a   |
| (O)  | O5  | 0.13790 | 0.29920 | 0.41930 | 1.000 | 0.012 | 4a   |
| (O)  | O6  | 0.56350 | 0.36480 | 0.58800 | 1.000 | 0.009 | 4a   |
| (Zn) | Zn1 | 0.52155 | 0.42180 | 0.97600 | 0.010 | 0.006 | 4a   |
| (Zn) | Zn2 | 0.47970 | 0.07670 | 0.97360 | 0.010 | 0.008 | 4    |

### Bi<sub>2</sub>WO<sub>6</sub>: 2% Zn

|      |     | x       | y       | z       | Occ.  | U     | Site |
|------|-----|---------|---------|---------|-------|-------|------|
| (Bi) | Bi1 | 0.52308 | 0.41890 | 0.97890 | 0.940 | 0.006 | 4a   |
| (Bi) | Bi2 | 0.48870 | 0.08030 | 0.97280 | 0.940 | 0.008 | 4a   |
| (W)  | W   | 0.00270 | 0.25130 | 0.00208 | 1.000 | 0.002 | 4a   |
| (O)  | O1  | 0.00139 | 0.14190 | 0.10490 | 1.000 | 0.011 | 4a   |
| (O)  | O2  | 0.24420 | 1.00890 | 0.25450 | 1.000 | 0.009 | 4a   |
| (O)  | O3  | 0.25136 | 0.49950 | 0.25070 | 1.000 | 0.005 | 4a   |
| (O)  | O4  | 0.65820 | 0.20810 | 0.13460 | 1.000 | 0.010 | 4a   |
| (O)  | O5  | 0.08070 | 0.23790 | 0.61620 | 1.000 | 0.012 | 4a   |
| (O)  | O6  | 0.56966 | 0.37030 | 0.59581 | 1.000 | 0.009 | 4a   |
| (Zn) | Zn1 | 0.52308 | 0.41890 | 0.97890 | 0.040 | 0.006 | 4a   |
| (Zn) | Zn2 | 0.48870 | 0.08030 | 0.97280 | 0.040 | 0.008 | 4a   |

### Bi<sub>2</sub>WO<sub>6</sub>: 4% Zn

|      |     | x       | y       | z       | Occ.  | U     | Site |
|------|-----|---------|---------|---------|-------|-------|------|
| (Bi) | Bi1 | 0.52308 | 0.41890 | 0.97890 | 0.940 | 0.006 | 4a   |
| (Bi) | Bi2 | 0.48870 | 0.08030 | 0.97280 | 0.940 | 0.008 | 4a   |
| (W)  | W   | 0.00270 | 0.25130 | 0.00208 | 1.000 | 0.002 | 4a   |
| (O)  | O1  | 0.00139 | 0.14190 | 0.10490 | 1.000 | 0.011 | 4a   |
| (O)  | O2  | 0.24420 | 1.00890 | 0.25450 | 1.000 | 0.009 | 4a   |
| (O)  | O3  | 0.25136 | 0.49950 | 0.25070 | 1.000 | 0.005 | 4a   |
| (O)  | O4  | 0.65820 | 0.20810 | 0.13460 | 1.000 | 0.010 | 4a   |
| (O)  | O5  | 0.08070 | 0.23790 | 0.61620 | 1.000 | 0.012 | 4a   |
| (O)  | O6  | 0.56966 | 0.37030 | 0.59581 | 1.000 | 0.009 | 4a   |
| (Zn) | Zn1 | 0.52308 | 0.41890 | 0.97890 | 0.040 | 0.006 | 4a   |
| (Zn) | Zn2 | 0.48870 | 0.08030 | 0.97280 | 0.040 | 0.008 | 4a   |

### Bi<sub>2</sub>WO<sub>6</sub>: 8% Zn

|      |     | x       | y       | z       | Occ.  | U     | Site |
|------|-----|---------|---------|---------|-------|-------|------|
| (Bi) | Bi1 | 0.52260 | 0.41817 | 0.98820 | 0.920 | 0.006 | 4a   |
| (Bi) | Bi2 | 0.48530 | 0.08148 | 0.98306 | 0.920 | 0.008 | 4a   |

|      |     |         |         |         |       |       |    |
|------|-----|---------|---------|---------|-------|-------|----|
| (W)  | W   | 0.00270 | 0.24970 | 0.01961 | 1.000 | 0.002 | 4a |
| (O)  | O1  | 0.12260 | 0.13830 | 0.11400 | 1.000 | 0.011 | 4a |
| (O)  | O2  | 0.35910 | 1.03488 | 0.37790 | 1.000 | 0.009 | 4a |
| (O)  | O3  | 0.21920 | 0.51500 | 0.29840 | 1.000 | 0.005 | 4a |
| (O)  | O4  | 0.62680 | 0.24540 | 0.08790 | 1.000 | 0.010 | 4a |
| (O)  | O5  | 0.09994 | 0.24720 | 0.58850 | 1.000 | 0.012 | 4a |
| (O)  | O6  | 0.53390 | 0.36550 | 0.57110 | 1.000 | 0.009 | 4a |
| (Zn) | Zn1 | 0.52260 | 0.41817 | 0.98820 | 0.920 | 0.080 | 4a |
| (Zn) | Zn2 | 0.48530 | 0.08148 | 0.98306 | 0.920 | 0.080 | 4a |

Fig. S2:  $\text{Bi}_2\text{WO}_6$  and  $\text{Bi}_2\text{WO}_6$ : 8%  $\text{Zn}^{2+}$  unit cells modeled using VESTA.

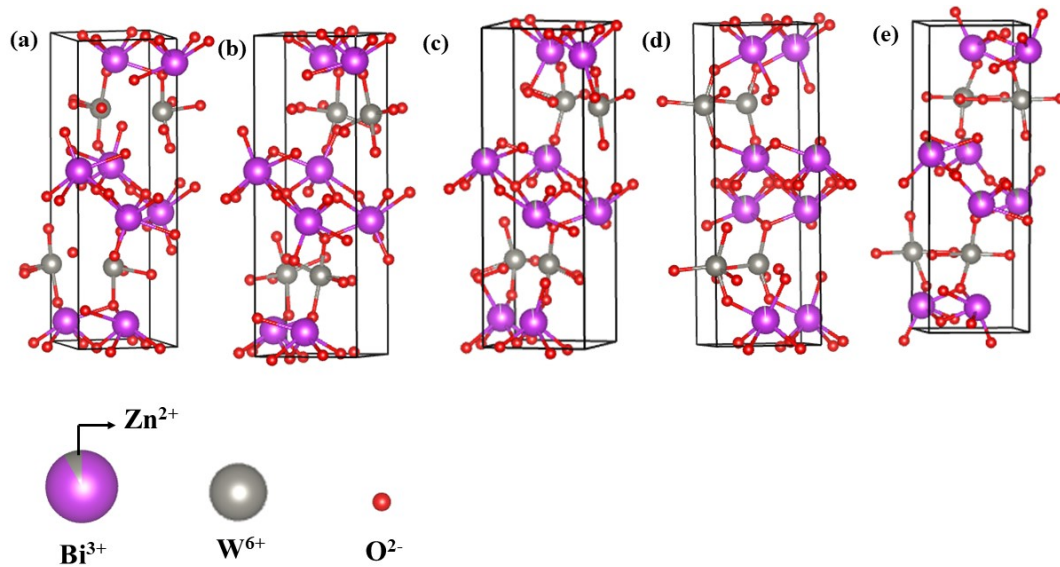

Fig. S3: EDS spectrum and elementary mapping, (a)  $\text{Bi}_2\text{WO}_6$  and (b)  $\text{Bi}_2\text{WO}_6$ : 8%  $\text{Zn}^{2+}$

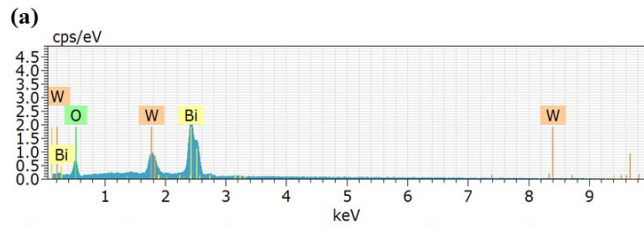

| Elements | AN | Series   | nor. C [wt.%] | Atom C [at.%] |
|----------|----|----------|---------------|---------------|
| Bi       | 83 | M-series | 57.6          | 39.67         |
| W        | 74 | M-series | 24.8          | 10.02         |
| O        | 8  | M-series | 17.6          | 50.31         |
| Total:   |    |          | 100.0         | 100.0         |

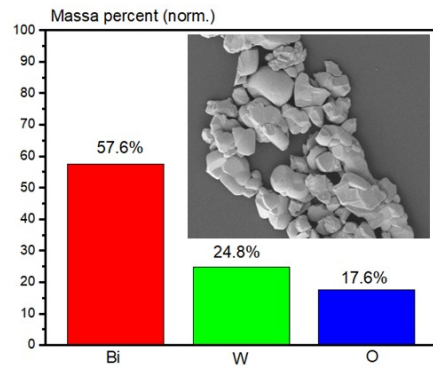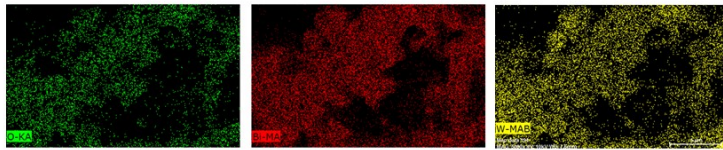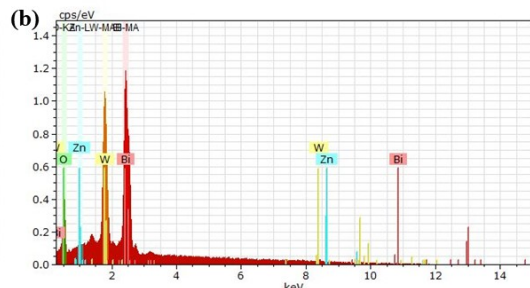

| Elements | AN | Series   | nor. C [wt.%] | Atom C [at.%] |
|----------|----|----------|---------------|---------------|
| Bi       | 83 | M-series | 54.3          | 33.85         |
| W        | 74 | M-series | 26.4          | 12.17         |
| O        | 8  | K-series | 14.0          | 51.62         |
| Zn       | 30 | L-series | 5.3           | 2.36          |
| Total:   |    |          | 100.0         | 100.0         |

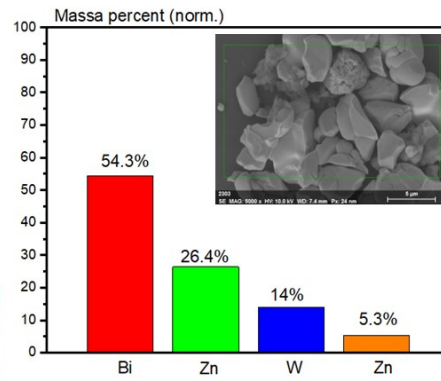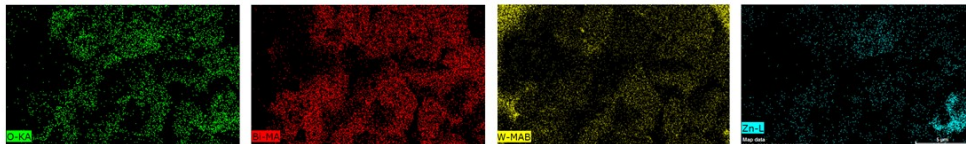

Supplement: d2dt03175b1.pdf [file d2dt03175b1.pdf]
